# Supplementary material
Source: HighWire-hosted journal article supplement (https://cmajopen.ca/highwire/filestream/90516/field_highwire_adjunct_files/2/open-2021-0337-2-at.pdf)
Supplement: open-2021-0337-2-at.pdf [file open-2021-0337-2-at.pdf]

Readiness of Emergency Departments for Pediatric Patients and Pediatric Mortality: A Systematic Review

**APPENDIX B.** Articles excluded based on full text review during initial and June 2021 updated screening and reasons for exclusion

**Table B1.**

| <b>Study</b>              | <b>Reason for exclusion</b>                                                                                          |
|---------------------------|----------------------------------------------------------------------------------------------------------------------|
| Barata et al., 2020       | Wrong intervention, intervention was pediatric emergency care coordinators and pediatric emergency medicine director |
| Bernard et al., 2014      | Wrong intervention, intervention was thrombolysis in pediatric stroke preparation                                    |
| Burt et al., 2007         | No relevant outcomes                                                                                                 |
| Gausche-Hill et al., 2014 | Full text not available (abstract only)                                                                              |
| Gausche-Hill et al., 2015 | No relevant outcomes                                                                                                 |
| Myers et al., 2019        | Full text not available (abstract only)                                                                              |
| Remick et al., 2016       | No relevant outcomes                                                                                                 |
| Remick et al., 2019       | No relevant outcomes                                                                                                 |
| Rice et al., 2016         | Full text not available (abstract only)                                                                              |
| Rutledge et al., 2019     | Full text not available (abstract only)                                                                              |
| Smith et al., 2016        | Wrong study design, review article                                                                                   |
| Whitfill et al., 2018     | No relevant outcomes                                                                                                 |
| Whitfill et al., 2020     | No relevant outcomes                                                                                                 |

**Table B2.**

| <b>Study</b>           | <b>Reason for exclusion</b>                                                                                          |
|------------------------|----------------------------------------------------------------------------------------------------------------------|
| Ames et al., 2020      | Wrong publication type, erratum                                                                                      |
| Auerbach et al., 2020  | Full text not available (abstract only)                                                                              |
| Abulebda et al., 2021a | No relevant outcomes                                                                                                 |
| Abulebda et al., 2021b | Wrong intervention, intervention was pediatric emergency care coordinators                                           |
| Balmaks et al., 2020   | Already included in initial search                                                                                   |
| Barata et al., 2020    | Wrong intervention, intervention was pediatric emergency care coordinators and pediatric emergency medicine director |
| Delele et al., 2021    | No relevant outcomes                                                                                                 |
| Foster et al., 2020    | Wrong study design, correspondence                                                                                   |
| Millogo et al., 2021   | Wrong population, not in acute or urgent care centres/EDs                                                            |
| Newgard et al., 2020   | Full text not available (abstract only)                                                                              |
| Stys et al., 2020      | No relevant outcomes                                                                                                 |
| Tan et al., 2020       | Wrong study design, retrospective chart review                                                                       |

### References to excluded studies

- Ames SG, Davis BS, Marin JR, L. Fink EL, Olson LM, Gausche-Hill M, et al. Emergency Department Pediatric Readiness and Mortality in Critically Ill Children. *Pediatrics*. 2019;144(3):e20190568. *Pediatrics*. 2020;145(5):e20200542. doi: 10.1542/peds.2020-0542.
- Auerbach M, Bhatnagar A, Abulebda K, Montgomery E, Whitfill T, Sessa A, et al. ImPACTS: A Collaborative Improvement Intervention Involving Children's Hospitals and General Hospitals Improves Pediatric Readiness. *Pediatrics* July 2020;146(1\_MeetingAbstract):203–204. doi: 10.1542/peds.146.1MA3.203.
- Abulebda K, Whitfill T, Montgomery EE, Thomas A, Dudas RA, Leung JS, et al. Improving Pediatric Readiness in General Emergency Departments: A Prospective Interventional Study. *The Journal of Pediatrics*. 2021a;230:230-237.e1. doi: 10.1016/j.jpeds.2020.10.040.
- Abulebda K, Lutfi R, Petras EA, Berrens ZJ, Mustafa M, Pearson, KJ, et al. Evaluation of a Nurse Pediatric Emergency Care Coordinator-Facilitated Program on Pediatric Readiness and Process of Care in Community Emergency Departments After Collaboration with a Pediatric Academic Medical Center. *Journal of emergency nursing* 2021b;47(1):167-180. doi: 10.1016/j.jen.2020.06.006.
- Balmaks R, Whitfill TM, Ziemele B, Blumberga M, Upenieks R, Vegeris I, et al. Pediatric Readiness in the Emergency Department and Its Association With Patient Outcomes in Critical Care: A Prospective Cohort Study. *Pediatr Crit Care Med*. 2020;21(5):e213-e220. doi: 10.1097/PCC.0000000000002255.
- Barata IA, Stadnyck JM, Akerman M, O'Neill K, Castaneda J, Subramony A, et al. Novel Approach to Emergency Departments' Pediatric Readiness Across a Health System. *Pediatr Emerg Care*. 2020;36(6):274-276. doi: 10.1097/PEC.0000000000001385.
- Bernard TJ, Rivkin MJ, Scholz K, deVeber G, Kirton A, Gill JC, et al. Emergence of the primary pediatric stroke center: impact of the thrombolysis in pediatric stroke trial. *Stroke*. 2014;45(7):2018-23. doi: 10.1161/STROKEAHA.114.004919.
- Burt CW, Middleton KR. Factors associated with ability to treat pediatric emergencies in US hospitals. *Pediatr Emerg Care*. 2007;23(10):681-9. doi: 10.1097/PEC.0b013e3181558d43.
- Delele TG, Biks GA, Abebe SM, Kebede ZT. Essential Newborn Care Service Readiness and Barriers in Northwest Ethiopia: A Descriptive Survey and Qualitative Study. *J Multidiscip Healthc*. 2021;14:713-725. doi: 10.2147/JMDH.S300362.
- Foster AA, Monuteaux MC, Li J. How ready are we? A statewide assessment of pediatric readiness policies. *The American Journal of Emergency Medicine*. 2020; 38(4):854.e1-854.e2. ISSN 0735-6757. doi: 10.1016/j.ajem.2020.01.048.
- Gausche-Hill M, Ely M, Schmuhl P, Telford R, Remick KE, Edgerton EA, et al. National assessment of pediatric readiness of emergency departments. *Academic Emergency Medicine*. 2014;21(5):S42-3.

Readiness of Emergency Departments for Pediatric Patients and Pediatric Mortality: A Systematic Review

Gausche-Hill M, Ely M, Schmuhl P, Telford R, Remick KE, Edgerton EA, et al. A national assessment of pediatric readiness of emergency departments. *JAMA Pediatr.* 2015;169(6):527-34. doi: 10.1001/jamapediatrics.2015.138.

Millogo O, Doamba JEO, Sié A, et al. Constructing a malaria-related health service readiness index and assessing its association with child malaria mortality: an analysis of the Burkina Faso 2014 SARA data. *BMC Public Health.* 2021;21(1):20. doi: 10.1186/s12889-020-09994-7

Myers S, Lorch S, Passarella M, and Carr B. 186 Pediatric Readiness of Hospitals Initially Caring for Severely Ill or Injured Children. *Annals of Emergency Medicine.* 2019;74(4):S74

Newgard C, Malveau S, McConnell J, Lin A, Gausche-Hill M, Kuppermann N, et al. A national evaluation of emergency department pediatric readiness and outcomes among United States trauma centers. *SAEM Annual Meeting Abstracts. Acad Emerg Med.* 2020;27: S7-S316. doi: 10.1111/acem.13961.

Remick K, Kaji AH, Olson L, Ely M, Schmuhl P, McGrath N, et al. Pediatric Readiness and Facility Verification. *Ann Emerg Med.* 2016;67(3):320-328.e1. doi: 10.1016/j.annemergmed.2015.07.500.

Remick K, Gaines B, Ely M, Richards R, Fendya D, and Edgerton EA. Pediatric emergency department readiness among US trauma hospitals. *J Trauma Acute Care Surg.* 2019;86(5):803-809. doi: 10.1097/TA.0000000000002172.

Rice AD, Dudek J, St. Mars T, and Woolridge D. 14 The Impact of a Pediatric Emergency Department Designation System on Pediatric Injury Mortality Rates in Arizona. *Annals of Emergency Medicine.* 2016;68(4):S6-7. doi: 10.1016/j.annemergmed.2016.08.024.

Rutledge C, Waddell K, Gaither S, and Tofil N. 1397: Assessing Community Hospital Management of Critically Ill Pediatric Patients in Alabama. *Critical Care Medicine.* 2019;47(1):675. doi: 10.1097/01.ccm.0000552141.67260.07.

Smith N, St Mars T, Woolridge D. Arizona's Emergency Medical Services for Children Pediatric Designation System for Emergency Departments. *J Emerg Med.* 2016;51(2):194-200. doi: 10.1016/j.jemermed.2016.03.034.

Stys D, Landry K, Mitra T, and Grant V. A provincial assessment of readiness for paediatric emergencies: What are the existing resource gaps in Alberta? *Paediatrics & Child Health.* 2020;25(8):498–504. doi: 10.1093/pch/pxz111

Tan JCL, Ang PH, Chong SL, Lee KP, Ong GYK, Zakaria NDB, et al. Differences in Utilisation of the General and Paediatric Emergency Departments by Paediatric Patients. *Ann Acad Med Singap.* 2020;49:948-54. doi:10.47102/annals-acadmedsg.2020327.

Whitfill T, Gawel M, Auerbach M. A Simulation-Based Quality Improvement Initiative Improves Pediatric Readiness in Community Hospitals. *Pediatr Emerg Care.* 2018;34(6):431-435. doi: 10.1097/PEC.0000000000001233.

Readiness of Emergency Departments for Pediatric Patients and Pediatric Mortality: A Systematic Review

Whitfill TM, Remick KE, Olson LM, Richards R, Brown KM, Auerbach MA, et al. Statewide Pediatric Facility Recognition Programs and Their Association with Pediatric Readiness in Emergency Departments in the United States. *J Pediatr*. 2020;218:210-216.e2. doi: 10.1016/j.jpeds.2019.10.017.
